# Supplementary material for: A dansyl-based fluorescent probe for selectively detecting Cu2+and imaging in living cells
Source: Royal Society of Chemistry journal article supplement (doi:10.1039/c5ra00740b), 2015-01-01

## Electronic Supplementary Information

### A dansyl-based fluorescent probe for selectively detecting Cu<sup>2+</sup> and imaging in living cells

Meijiao Cao, Lina Jiang, Fang Hu, Yufeng Zhang, Wen Chao Yang\*, Sheng Hua  
Liu\*, Jun Yin\*

Key Laboratory of Pesticide and Chemical Biology, Ministry of Education, College  
of Chemistry, Central China Normal University, Wuhan 430079, PR China

Tel: +86-27-67867725 Fax: +86-27-67867725

Corresponding author E-mail: yinj@mail.ccnu.edu.cn, [chshliu@mail.ccnu.edu.cn](mailto:chshliu@mail.ccnu.edu.cn),  
[tomyang@mail.ccnu.edu.cn](mailto:tomyang@mail.ccnu.edu.cn)

#### Contents

|                                                                                          |    |
|------------------------------------------------------------------------------------------|----|
| 1. The UV response of <b>1</b> to metal ions.....                                        | 1S |
| 2. The saturation curve of <b>1</b> with various concentration of Cu <sup>2+</sup> ..... | 2S |
| 3. Job's plot of <b>1</b> -Cu <sup>2+</sup> complex.....                                 | 3S |
| 4. <sup>1</sup> H NMR, <sup>13</sup> C NMR and EI characterization of <b>1</b>           |    |

## 1. The UV response of **1** to metal ions

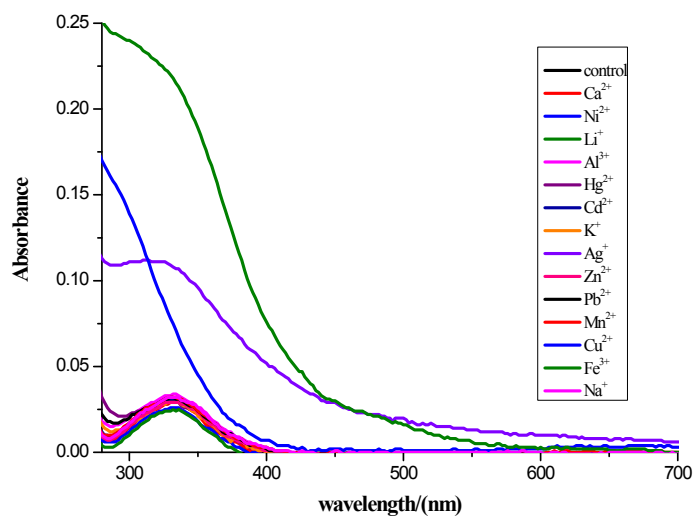

**Figure 1S.** UV-Vis spectra of **1** (10 μM) with various metal ions (100 μM) in HEPES buffer (0.02 M, pH=7.0)/DMSO (8/2, v/v).

## 2. The saturation curve of **1** with various concentration of Cu<sup>2+</sup>

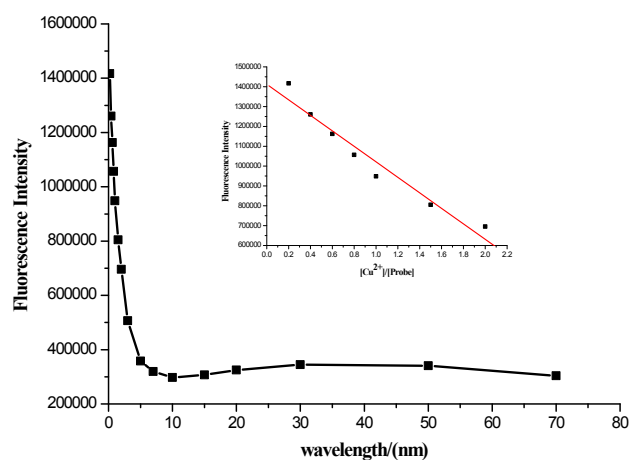

**Figure 2S.** The saturation curve of **1** with various concentration of Cu<sup>2+</sup> in HEPES buffer (0.02 M, pH=7.0)/DMSO (8/2, v/v) excited at 360 nm. The fluorescence intensity of **1** as a function of Cu<sup>2+</sup> concentration and the linear part (inset).

### 3. Job's plot of 1-Cu<sup>2+</sup> complex

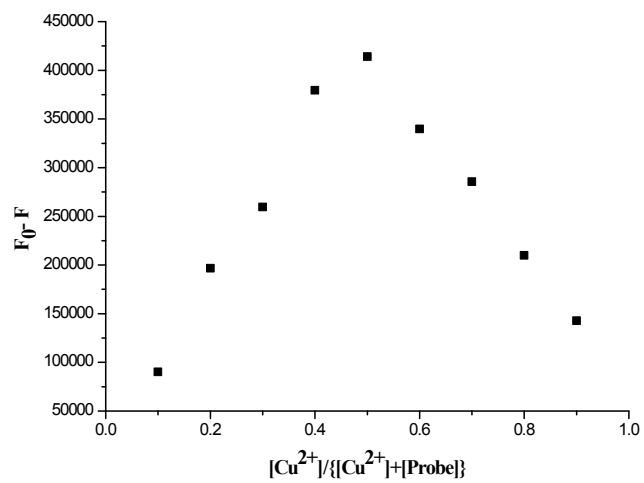

**Figure 3S.** Job's plot according to the method for continuous variations (the total concentration of **1** and Cu<sup>2+</sup> is 10  $\mu$ M).

4.  $^1\text{H}$  NMR,  $^{13}\text{C}$  NMR and EI characterization of **1**

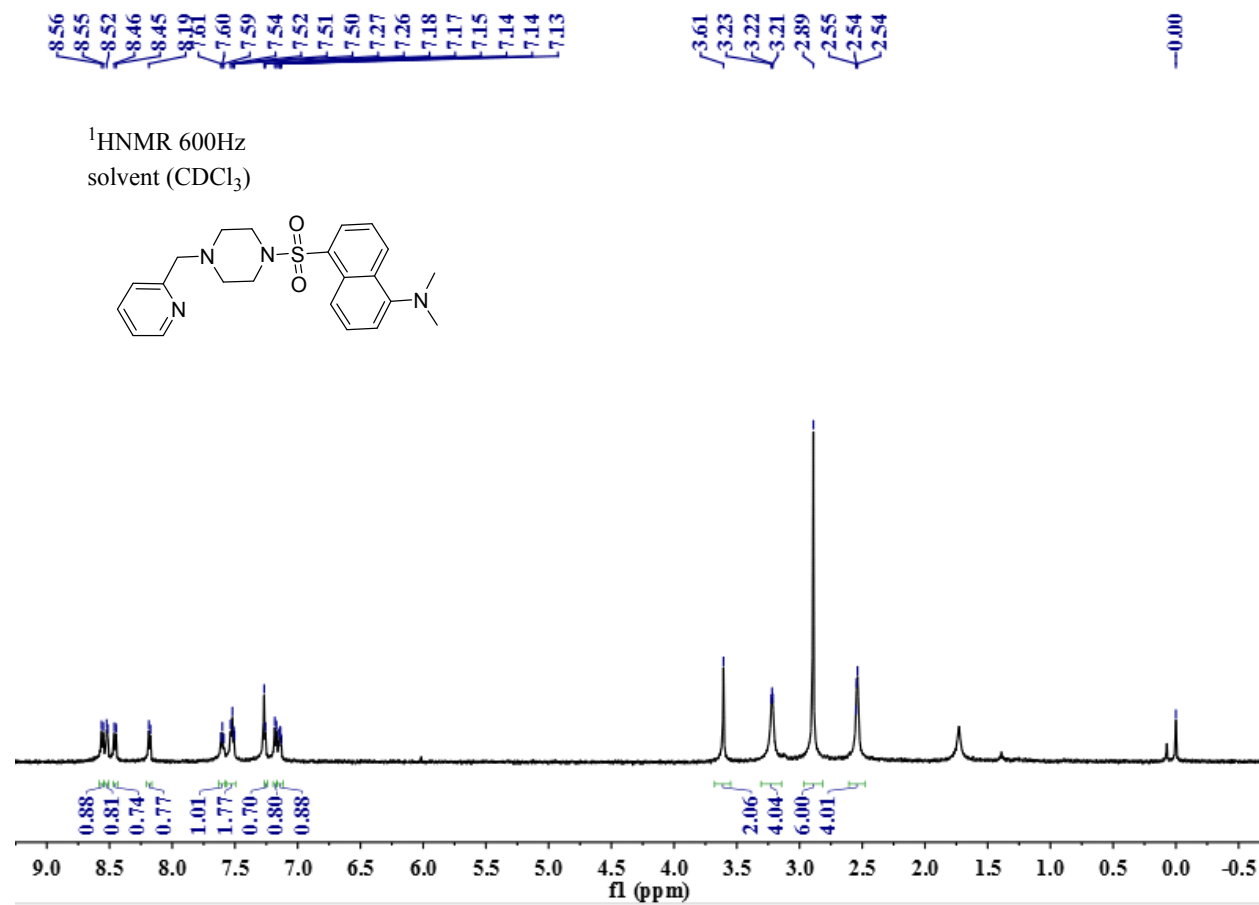

$\delta$  157.46  
 $\delta$  151.48  
 $\delta$  149.24  
 $\delta$  136.30  
 $\delta$  132.28  
 $\delta$  130.42  
 $\delta$  129.87  
 $\delta$  127.78  
 $\delta$  123.12  
 $\delta$  122.98  
 $\delta$  122.07  
 $\delta$  119.64  
 $\delta$  115.04  
 $\delta$  77.31  
 $\delta$  76.99  
 $\delta$  76.67  
 $\delta$  63.91  
 $\delta$  52.34  
 $\delta$  45.49  
 $\delta$  45.27

$^{13}\text{C}$ NMR 100Hz  
solvent ( $\text{CDCl}_3$ )

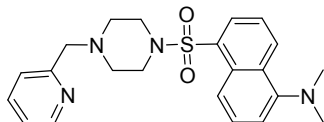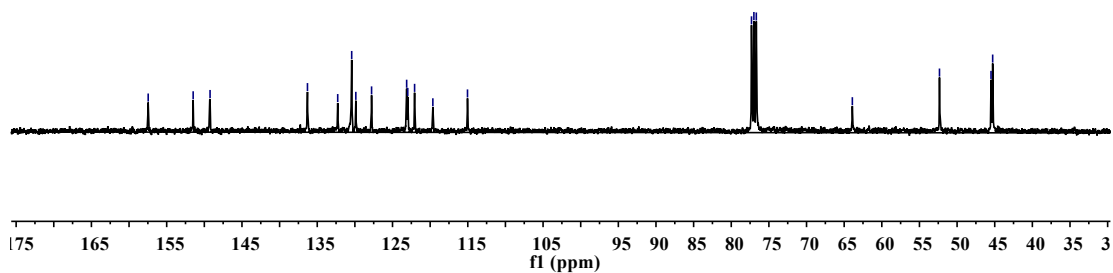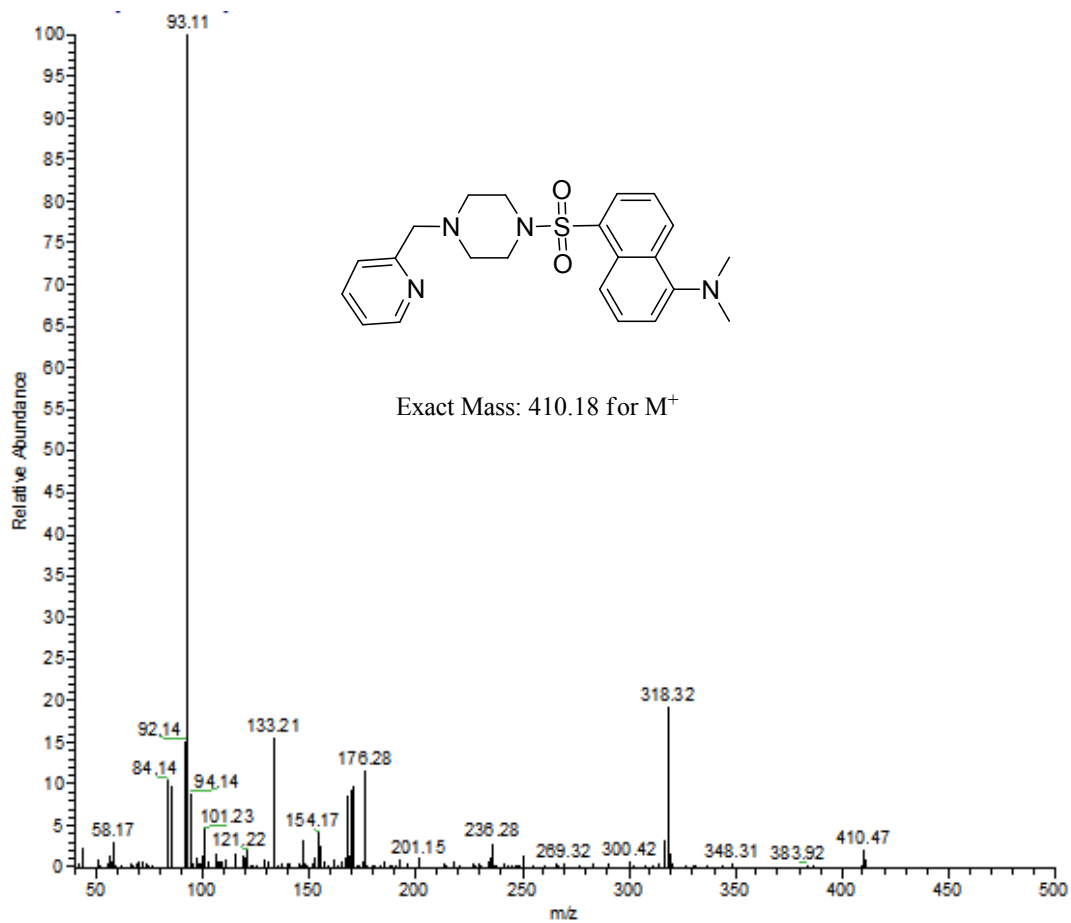

Supplement: c5ra00740b1.pdf [file c5ra00740b1.pdf]
